# Supplementary material for: CATCHprofiles: Clustering and Alignment Tool for ChIP Profiles
Source: PLOS journal article supplement (doi:10.1371/journal.pone.0028272), 2012-01-04
Supplement: S2 (10.1371/journal.pone.0028272.s002) [file journal.pone.0028272.s002]

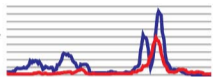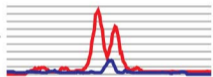

average profile pattern

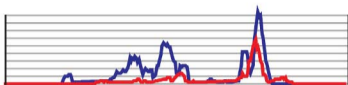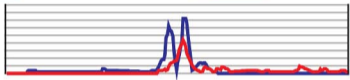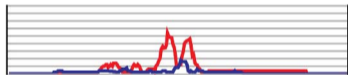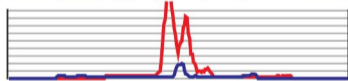

aligned profiles
